# Supplementary material for: Investigating the Impact of the Spatiotemporal Bias Correction of Precipitation in CMIP6 Climate Models on Drought Assessments
Source: MDPI journal article supplement (doi:10.3390/rs14236172), 2022-12-06
Supplement: s1 [file s1]

Archive with 1 entries (1 files):
- remotesensing-1938298-supplementary.pdf
